# Supplementary material for: Studies on the photoelectronic properties of a manganese (Mn)-doped lead-free double perovskite
Source: Royal Society of Chemistry journal article supplement (doi:10.1039/d2cp03242b), 2022-01-01
Supplement: d2cp03242b1.pdf [file d2cp03242b1.pdf]

## Supporting Information

Studies on the Photoelectronic Properties of Manganese (Mn)-doped Lead-free  
Double Perovskite

Shaoming Xue,<sup>1</sup> Qiaoqian Wu,<sup>1</sup> Qihong Huo,<sup>1,2</sup> Jun Mi,<sup>1,2</sup> ChengBo Guan,<sup>1</sup>  
Wei-Yan Cong,<sup>1</sup> Zhenkui Zhang<sup>3</sup> and Junfeng Ren<sup>4</sup> Ying-Bo Lu,<sup>1,2,a)</sup>

<sup>1</sup> School of Space Science and Physics, Shandong University, Weihai 264209,  
China

<sup>2</sup> Physical-Chemical Materials Analytical & Testing Center, Shandong  
University, Weihai 264209, China

<sup>3</sup> School of Science, Langfang Normal University, Langfang 065000, China

<sup>4</sup> School of Physics and Electronics, Shandong Normal University, Jinan 250014,  
China

a) Author to whom correspondence should be addressed.

Electronic mail: lyb@sdu.edu.cn.

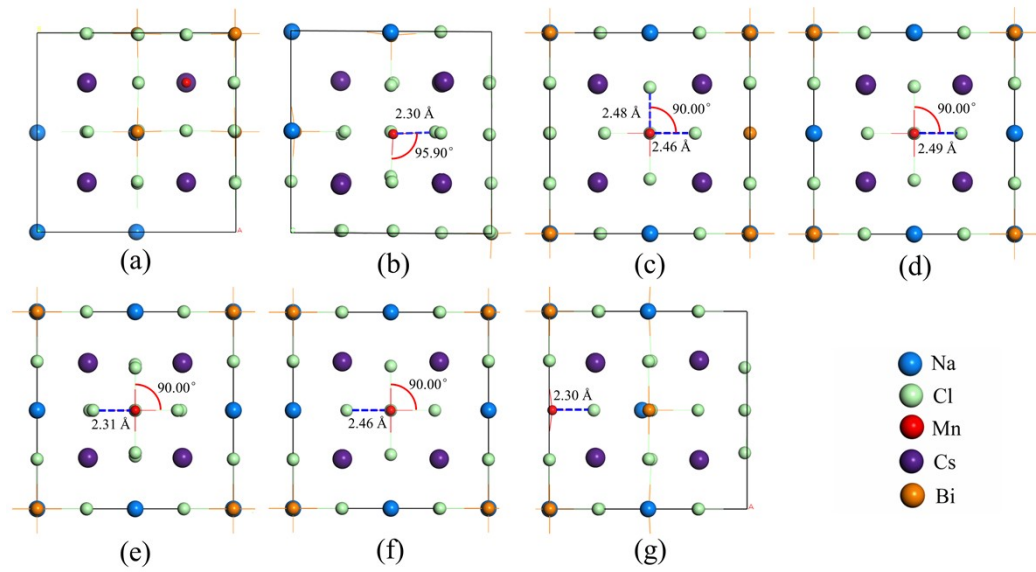

Figure S1. Geometric structures of  $\text{Cs}_2\text{NaBiCl}_6$  containing the (a)  $\text{Mn}_{\text{Cs}}$  defects (b)  $\text{Mn}_{\text{Na}}\text{V}_{\text{Cs}}$  defects (c)  $\text{Mn}_{\text{Na}}\text{V}_{\text{Na}}$  defects (d)  $\text{Mn}_{\text{Na}}\text{Mn}_{\text{Bi}}$  defects (local structure of  $\text{Mn}_{\text{Na}}$  in  $\text{Mn}_{\text{Na}}\text{Mn}_{\text{Bi}}$  defects) (e)  $\text{Mn}_{\text{Na}}\text{Mn}_{\text{Bi}}$  defects (local structure of  $\text{Mn}_{\text{Bi}}$  in  $\text{Mn}_{\text{Na}}\text{Mn}_{\text{Bi}}$  defects) (f)  $\text{Mn}_{\text{Na}}$  defects (g)  $\text{Mn}_{\text{Bi}}\text{V}_{\text{Cl}}$  defects, respectively.

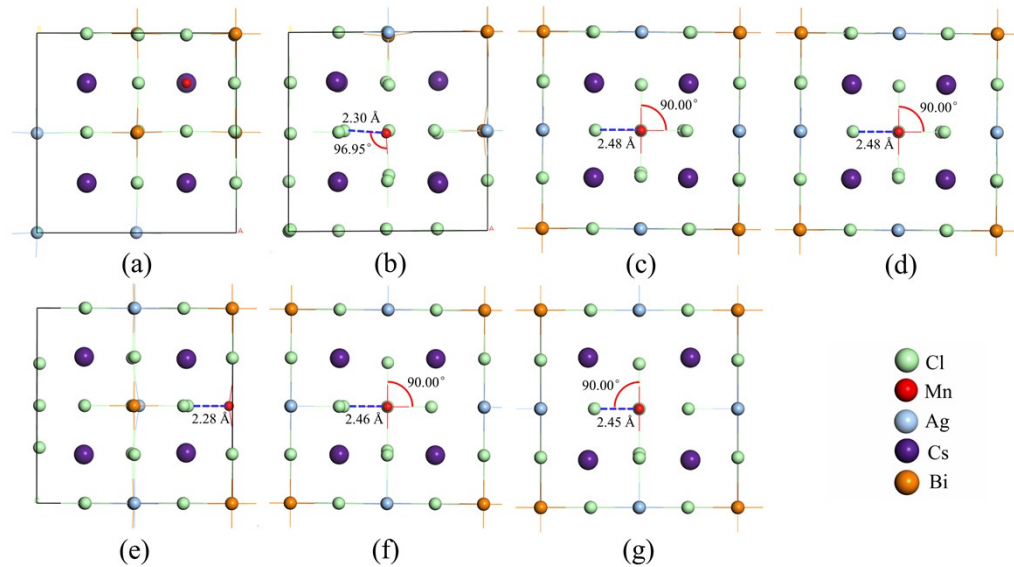

Figure S2. Geometric structures of  $\text{Cs}_2\text{AgBiCl}_6$  containing the (a)  $\text{Mn}_{\text{Cs}}$  defects (b)  $\text{Mn}_{\text{Ag}}\text{V}_{\text{Cs}}$  defects (c)  $\text{Mn}_{\text{Ag}}\text{Mn}_{\text{Bi}}$  defects (local structure of  $\text{Mn}_{\text{Ag}}$  in  $\text{Mn}_{\text{Ag}}\text{Mn}_{\text{Bi}}$  defects) (d)  $\text{Mn}_{\text{Ag}}\text{Mn}_{\text{Bi}}$  defects (local structure of  $\text{Mn}_{\text{Bi}}$  in  $\text{Mn}_{\text{Ag}}\text{Mn}_{\text{Bi}}$  defects) (e)  $\text{Mn}_{\text{Bi}}\text{V}_{\text{Cl}}$  defects (f)  $\text{Mn}_{\text{Ag}}$  defects (g)  $\text{Mn}_{\text{Ag}}\text{V}_{\text{Ag}}$  defects, respectively.

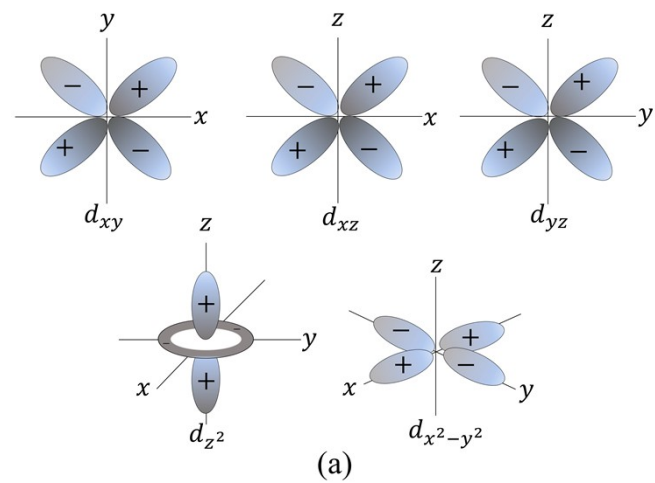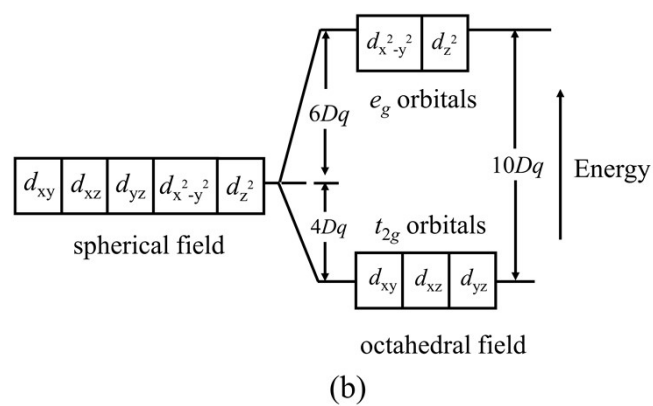

Figure S3. Scheme to describe the splitting of  $d$ -orbital from the (a) spherical to the (b) octahedral crystal field, respectively, as a result of the interaction of metal orbitals with ligand orbitals.

Table S1. Calculated IpCOHP in Cs<sub>2</sub>NaBiCl<sub>6</sub>:Mn<sup>2+</sup> and Cs<sub>2</sub>AgInCl<sub>6</sub>:Mn<sup>2+</sup> systems. The E<sub>F</sub> represents the Fermi level.

|                                                       |             | Distance (Å) | IpCOHP at E <sub>F</sub> |
|-------------------------------------------------------|-------------|--------------|--------------------------|
| Cs <sub>2</sub> NaBiCl <sub>6</sub> :Mn <sup>2+</sup> | Cl6-Mn29    | 2.34         | -2.10                    |
|                                                       | Cl10-Mn29   | 2.34         | -2.10                    |
|                                                       | Cl14-Mn29   | 2.34         | -2.04                    |
|                                                       | Cl18-Mn29   | 2.34         | -2.04                    |
|                                                       | Cl22-Mn29   | 2.34         | -1.98                    |
|                                                       | Cl26-Mn29   | 2.34         | -1.98                    |
|                                                       | Ave. IpCOHP |              | -2.04                    |
| Cs <sub>2</sub> AgInCl <sub>6</sub> :Mn <sup>2+</sup> | Cl6-Mn25    | 2.42         | -1.66                    |
|                                                       | Cl13-Mn25   | 2.44         | -1.62                    |
|                                                       | Cl14-Mn25   | 2.42         | -1.66                    |
|                                                       | Cl15-Mn25   | 2.44         | -1.62                    |
|                                                       | Cl16-Mn25   | 2.42         | -1.72                    |
|                                                       | Cl17-Mn25   | 2.42         | -1.72                    |
|                                                       | Ave. IpCOHP |              | -1.66                    |

---

### The detailed descriptions of computing the change in $Dq$ and $B, C$

For  $\text{Cs}_2\text{NaBiCl}_6:\text{Mn}^{2+}$  systems, the PLE band peaking at  $\sim 297$  nm and 358 nm are ascribed to the  ${}^6\text{A}_1({}^6\text{S})\text{-}{}^4\text{T}_1({}^4\text{P})$  and  ${}^6\text{A}_1({}^6\text{S})\text{-}{}^4\text{T}_2({}^4\text{D})$  transitions of  $\text{Mn}^{2+}$ , respectively. The orange-yellow PL peak at 577 nm is attributed to the  ${}^4\text{T}_1({}^4\text{G})\text{-}{}^6\text{A}_1({}^6\text{S})$  transitions of  $\text{Mn}^{2+}$ . The equation (2), (3) and (5) in the main text can change to:

$$7B + 7C = \frac{10^7}{297} \quad (6)$$

$$17B + 5C = \frac{10^7}{358} \quad (7)$$

$$E_2 = \frac{10^7}{577} \quad (8)$$

Connecting equations (6) and (7) above, we can obtain  $B$  and  $C$  are  $324 \text{ cm}^{-1}$  and  $4486 \text{ cm}^{-1}$ , respectively. The equation (4) in the main text can be simplified as:

$$Dq = \left\{ \left[ \frac{36B^2(E_2 - 10B - 5C)}{19B + 7C - E_2} + (10B + 7C - E_2)(10B + 5C - E_2) \right] \frac{1}{100} \right\}^{\frac{1}{2}} \quad (9)$$

Taking the values of  $E_2$ ,  $B$  and  $C$  into the equation (9), then  $Dq = 1195 \text{ cm}^{-1}$  is acquired. Thus, we obtain  $B = 324 \text{ cm}^{-1}$ ,  $C = 4486 \text{ cm}^{-1}$  and  $Dq = 1195 \text{ cm}^{-1}$ , respectively.

For  $\text{Cs}_2\text{AgInCl}_6:\text{Mn}^{2+}$  systems, the calculation steps are similar to the details discussed above. Thus, the calculation results of the  $B$ ,  $C$  and  $Dq$  are  $509 \text{ cm}^{-1}$ ,  $5071 \text{ cm}^{-1}$  and  $1895 \text{ cm}^{-1}$ , respectively.

---

### **The detailed descriptions of how to draw the Tanabe-Sugano diagrams**

We attach the original references about the Tanabe-Sugano diagrams for  $d^5$  in here<sup>1</sup> (10.1143/JPSJ.9.766), which we draw Figure 8 in the manuscript by reference to this original literature.

1. Y. Tanabe and S. Sugano, *J. Phys. Soc. Japan*, 1954, **9**, 766-779.
